# Supplementary material
Source: bioRxiv or medRxiv preprint supplement (https://www.medrxiv.org/highwire/filestream/73762/field_highwire_adjunct_files/0/2020.03.15.20036319-1.pdf)
Supplement: Supplementary file [file 2020.03.15.20036319-1.pdf]

武汉儿童医院 武汉市妇幼保健院  
Wuhan Children's Hospital  
Wuhan Maternal and Child Healthcare Hospital

---

100 Hongkong Road  
Jiang'an District  
Wuhan, Hubei, China

Postcode: 430016  
Telephone: 027-82300016  
Fax: 027-82423687

Medical Ethical Approval of "The clinical and epidemiological features  
and hints of 82 confirmed COVID-19 pediatric cases aged 0-16 in Wuhan,  
China"

武儿医 2020012

(WHCH 2020012)

Confirmed by the Medical Ethics Committee of Wuhan Children's Hospital  
(Wuhan Maternal and Child Healthcare Hospital), the study titled "The clinical and  
epidemiological features and hints of 82 confirmed COVID-19 pediatric cases aged  
0-16 in Wuhan, China" conducted by our hospital meets the medical ethics  
requirements. The Medical Ethics Committee reviewed the protocol, informed  
consent form and other materials and approved this study.

武汉儿童医院（武汉市妇幼保健院）伦理委员会  
Medical Ethics Committee of Wuhan Children's Hospital  
(Wuhan Maternal and Child Healthcare Hospital)

2020 年 3 月

Date Mar., 2020
